# Supplementary material
Source: PubMed Central journal article supplement (PMC3323193)
Supplement: jcbfm201190x1.pdf [file jcbfm201190x1.pdf]

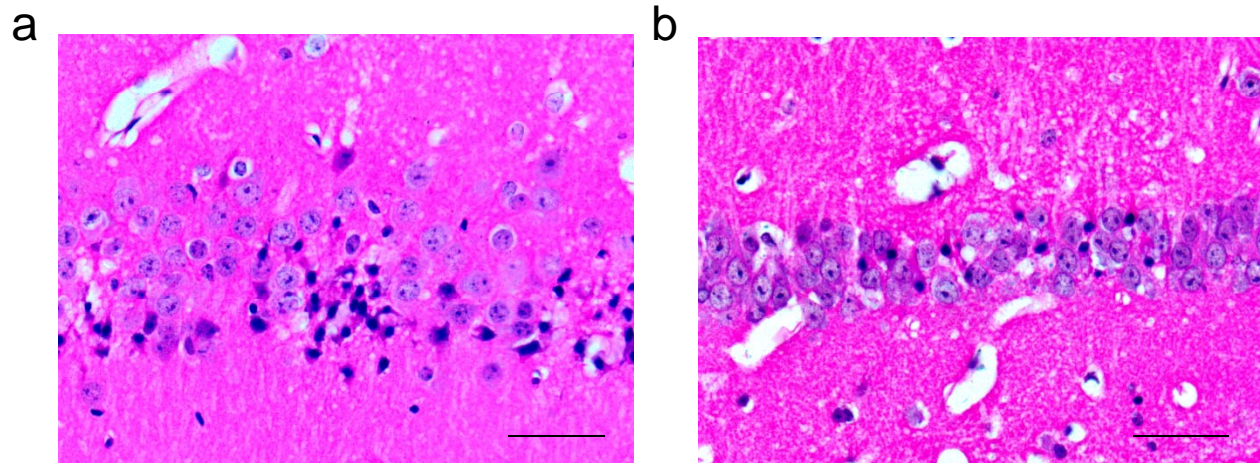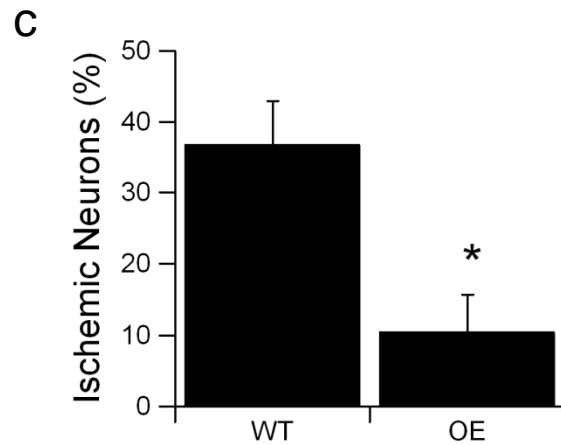

**Supplemental Figure 1** Transgenic overexpression of SK2 increases survival of CA1 neurons following cardiac arrest. (a) Representative photomicrograph of hippocampal CA1 neurons from a wild type mouse stained with H&E 3 days after CA/CPR. Damaged neurons identified by the presence of pink eosinophilic cytoplasm and a dark pyknotic nucleus. (b) Representative photomicrograph of hippocampal CA1 neurons from an SK2 overexpressing transgenic mouse stained with H&E 3 days after CA/CPR. Damaged neurons identified by the presence of pink eosinophilic cytoplasm and a dark pyknotic nucleus. (c) Quantification of ischemic neurons in the CA1 region of the hippocampus 3 days after CA/CPR. Data is presented as mean  $\pm$  SEM. N = 7 and 10 for WT and SK2-OE, respectively. The symbol \* indicates  $P < 0.05$  compared to wild type.

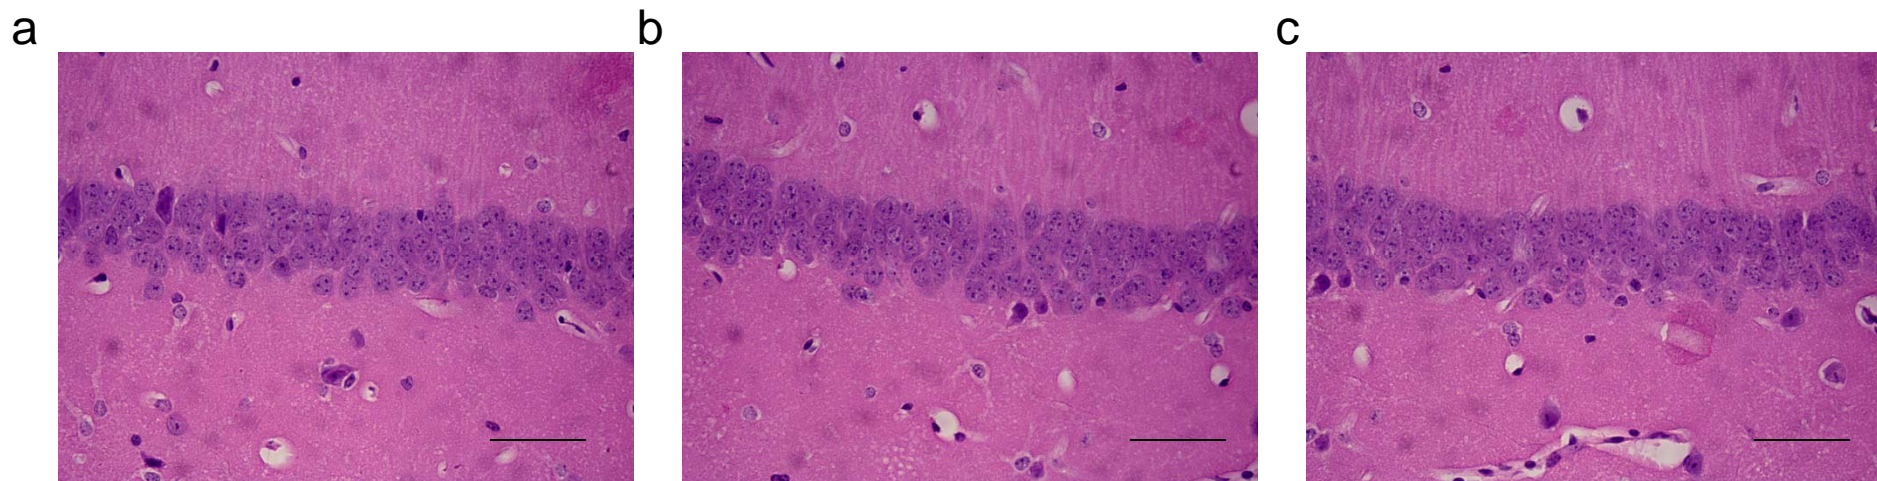

**Supplemental Figure 2.** No damage observed in sham operated control mice. **a**, Representative photomicrograph of hippocampal CA1 neurons from a wild type mouse injected with vehicle (intraperitoneal (IP) injection) 30 minutes before and 6 hours after sham operation and stained with H&E 3 days later. **b**, Representative photomicrograph of hippocampal CA1 neurons from a wild type mouse injected with 16 mg/kg 1-EBIO (intraperitoneal (IP) injection) 30 minutes before and 6 hours after sham operation and stained with H&E 3 days later. **c**, Representative photomicrograph of hippocampal CA1 neurons from a wild type mouse injected with 0.1 mg/kg apamin (intraperitoneal (IP) injection) 30 minutes before and 6 hours after sham operation and stained with H&E 3 days later.

|                            | Sham Vehicle | Sham 1-EBIO | CA/CPR Vehicle | CA/CPR 1-EBIO |
|----------------------------|--------------|-------------|----------------|---------------|
| Total Distance Day -1 (cm) | 10790±381    | 11124±388   | 11043±370      | 9704±345      |
| Total Distance Day 5 (cm)  | 10405±331    | 9691±294    | 9901±664       | 7987±569      |
| Velocity Day -1 (cm/s)     | 6.0±0.21     | 6.2±0.21    | 6.1±0.21       | 5.4±0.20      |
| Velocity Day 5(cm/s)       | 5.8±0.19     | 5.4±0.16    | 5.5±0.37       | 4.4±0.32      |

Supplemental Table 1. Open Field Data. Total distance moved and velocity was measured before surgery (Day -1) and 5 days after sham or CA/CPR (Day 5). Statistical analysis using One-Way ANOVA revealed no significant differences. Data are presented as mean±SEM

|                         | Sham       | CA/CPR 15min | CA/CPR 3hr | CA/CPR 24hr           | CA/CPR+1-EBIO          |
|-------------------------|------------|--------------|------------|-----------------------|------------------------|
| Membrane Potential (mV) | -62.6±0.8  | -65.3±1.9    | -65.5±2.3  | -59.7±1.6             | -70.4±1.2 <sup>#</sup> |
| Input Resistance (MΩ)   | 165.8±12.6 | 181.6±23.9   | 187.9±57.1 | 155.7±27.6            | 226.1±42.3             |
| Access Resistance (MΩ)  | 16.0±0.9   | 18.3±0.8     | 14.7±1.8   | 21.1±1.1 <sup>*</sup> | 15.2±1.2               |
|                         |            |              |            |                       |                        |

Supplemental Table 2. Biophysical properties of CA1 neurons. \* indicates P < 0.05 compared to Sham. # indicates P < 0.05 compared to Sham, not significantly different from CA/CPR alone at same timepoint (3 hr). Data are presented as mean±SEM
